# Supplementary material for: Application of Volumetric Absorptive Microsampling (VAMS) for the simultaneous determination of cadmium and lead in blood
Source: Research Square preprint supplement (doi:10.21203/rs.3.rs-7251995/v1), 2025-10-05
Supplement: Supplementary file 1 [file 5044bcbf3ffbe38b31d7c74d.xlsx]

## Sheet: data
				cadmium (Cd) [µg/l]			lead (Pb) [µg/l]
no	prewashed	included in statistical analysis	reason for exclusion	venous blood	VAMS blank	VAMS sample (blank corrected)	venous blood	VAMS blank	VAMS sample (blank corrected)	days of storage
1	no	yes		0.456936	0.0672125	0.466849	19.312	7.18288	20.1983	35
2	no	yes		0.142122	0.140223	0.206207	7.7884	3.47193	8.80649	35
3	no	yes		0.239346	0.154409	0.23403	10.8025	3.77837	10.6413	34
4	no	yes		0.21803	0.0293918	0.361598	11.5594	2.69924	13.0497	35
5	no	yes		0.909401	0.0722925	0.944946	15.1733	4.50916	15.6115	35
6	no	yes		0.125108	0.0983201	0.153114	12.703	3.45542	14.0061	34
7	no	yes		0.240147	0.10386	0.119934	4.99053	5.51766	5.87712	35
8	no	yes		0.275746	0.0829111	0.262809	8.9788	4.2858	8.46757	34
9	no	yes		0.258201	0.307143	0.264627	7.0248	5.94829	6.82999	34
10	no	yes		0.268085	0.324276	0.401949	9.24567	6.10176	10.2857	34
11	no	no	handling mistake	0.638766	0.205972	0.933949	11.5471	12.5747	16.9003	34
12	no	no	handling mistake	0.16427	0.454621	0.405537	6.14559	5.12151	9.39737	34
13	no	yes		0.197556	0.0374596	0.18889	9.549	3.41118	9.98902	29
14	no	yes		0.152355	0.268523	0.144772	6.86597	373.044	7.97146	29
15	no	yes		0.184168	0.051335	0.0838049	5.16015	2.90655	5.39386	29
16	no	yes		0.411952	0.044934	0.357497	38.1254	2.52786	40.394	29
17	no	yes		0.389266	0.0737909	0.601094	8.29376	2.40701	9.14539	29
18	no	yes		0.968959	0.0256586	1.13507	13.1803	2.95594	14.916	29
19	no	no	RSD > 30%	0.111964	0.095035	0.406059	9.35167	4.88088	10.2326	29
20	no	yes		0.527273	0.131161	0.552026	6.94467	3.34392	8.25954	27
21	no	yes		0.253085	0.156376	0.180332	7.58106	5.75696	7.1613	27
22	no	yes		0.145261	0.116074	0.172518	11.5316	2.75814	11.8801	27
23	no	yes		0.13866	0.228988	0.209289	5.69411	7.66983	7.19337	27
24	no	yes		0.0860262	0.112361	0.02372	4.9971	5.52191	4.73098	27
25	no	yes		0.321913	0.0236423	0.284834	13.9751	4.56048	13.6412	42
26	no	yes		0.181859	0.0503605	0.205176	7.17557	1.31025	6.83067	38
27	no	yes		0.342587	0.0183111	0.369569	12.3832	1.89228	13.0199	38
28	no	yes		0.299943	0.0861285	0.26946	16.5064	2.84918	16.9582	38
29	no	yes		0.234737	0.0518277	0.191701	6.55227	18.8659	5.85543	38
30	no	yes		0.18088	0.0494627	0.158808	8.18619	2.41259	8.09509	38
31	no	yes		0.59041	0.0517329	0.581041	7.69432	3.02228	6.39624	30
32	no	yes		0.241113	0.0948965	0.273831	8.34245	4.47087	8.6286	30
33	no	yes		0.320571	0.0309654	0.285093	9.80071	7.25365	9.35963	30
34	no	yes		0.451619	0.112333	0.472935	14.3801	3.1117	15.231	27
35	no	yes		0.298461	0.191123	0.319352	9.7552	184.171	9.14355	27
36	no	yes		0.269843	0.0591298	0.160251	10.5749	3.9208	7.96663	30
37	no	yes		0.176131	0.0819832	0.184807	13.0874	3.46486	13.353	27
38	no	yes		0.3883	0.0676527	0.452374	7.68956	1.74504	9.54334	27
39	no	yes		0.856786	0.017976	0.766062	15.5475	2.68428	14.382	27
40	no	yes		0.255483	0.0615441	0.304838	6.10051	2.1954	4.55213	23
41	no	yes		0.0968153	0.0479005	0.125451	12.1754	2.59458	11.6199	23
42	no	yes		0.171497	0.0459979	0.172443	9.87033	2.36574	9.17348	23
43	no	yes		0.579966	0.0872998	0.656359	43.133	2.32519	41.2679	23
44	no	yes		1.1429	0.0281142	1.39548	8.57944	1.6593	8.00626	22
45	no	yes		0.0962367	0.00993211	0.151678	4.57164	2.2927	3.10003	22
46	no	yes		0.205686	0.0460725	0.184807	7.2449	1.91124	6.42015	22
47	no	yes		0.158136	0.0151402	0.269566	6.60696	2.27367	8.5034	22
48	no	yes		0.193126	0.0819773	0.214533	10.4595	3.08331	8.70828	14
49	no	yes		0.177193	0.0499329	0.199702	14.3552	2.58188	14.6306	15
50	no	yes		0.205284	0.0187669	0.222741	10.4884	3.95511	9.52064	15
51	no	yes		0.142461	0.0157493	0.114458	12.3943	62.6476	10.3266	14
52	no	yes		0.828622	0.0211669	0.861306	17.5004	8.98035	18.5787	15
53	no	yes		0.214987	0.0318431	0.0961779	9.99384	4.59	8.94005	14
54	no	yes		0.175645	0.0608158	0.138049	7.60144	4.05859	7.47633	14
55	no	no	contaminated batch	0.267577	0.789216	-0.0428073	8.76325	9.66328	7.89427	9
56	no	no	contaminated batch	0.287685	0.261763	0.17442	9.20632	3.22968	8.32617	9
57	no	no	contaminated batch	0.233501	0.415496	-0.12218	7.34863	6.92603	5.46496	9
58	no	no	contaminated batch	0.134402	0.7796	-0.112238	18.6775	13.0651	23.8592	8
59	no	no	contaminated batch	0.429099	0.258208	0.389694	36.5663	3.72611	37.8268	8
60	no	no	contaminated batch	0.182135	0.417574	0.224183	8.96221	10.654	10.3192	7
61	yes	yes		1.33153	0.0344819	1.57986	5.27601	0.716657	7.18535	51
62	yes	yes		0.381129	0.0910299	0.342457	7.80704	0.583914	8.77845	51
63	yes	yes		0.306257	0.0934343	0.385469	12.2503	17.412	12.5103	50
64	yes	yes		1.34153	0.139225	1.29748	20.1148	2.17006	19.1756	50
65	yes	yes		0.124936	0.0587556	0.198124	10.8541	2.44918	11.7561	30
66	yes	no	RSD > 30%	0.148715	0.135168	1.15904	9.85766	0.398766	22.8191	30
67	yes	yes		0.236809	0.179827	0.382915	17.2103	0.645498	19.6819	27
68	yes	yes		0.293916	0.0364637	0.491429	6.02457	0.325935	7.78117	15
69	yes	yes		1.21679	0.0752752	1.37051	16.6068	0.578579	16.4523	27
70	yes	yes		0.28634	0.0184618	0.327671	6.78323	0.369566	8.51996	50
71	yes	yes		0.276913	0.01712	0.436425	14.0754	0.184658	15.9666	50
72	yes	yes		1.31412	0.0531629	1.35249	17.5479	0.377718	18.4405	50
73	yes	yes		0.103482	0.057266	0.083121	13.4498	0.477206	13.9453	51
74	yes	yes		0.25248	0.01712	0.336991	5.56711	0.185306	5.28551	50
75	yes	yes		0.20183	0.0637254	0.191845	11.6914	0.171453	12.7997	49
76	yes	yes		0.232276	0.01712	0.291079	9.7582	0.316484	10.1947	30
77	yes	yes		0.0631126	0.0748281	0.0365459	7.88226	0.699859	8.06391	15
78	yes	yes		0.149317	0.01712	0.17452	5.91851	0.10474	6.68756	15
79	yes	yes		0.144803	0.0186901	0.139443	7.45062	0.30935	8.0842	15
80	yes	yes		0.152023	0.01712	0.176199	6.94407	0.200027	7.15696	15
81	yes	yes		0.373564	0.0184266	0.398939	23.821	0.363852	24.3333	15
82	yes	yes		0.22593	0.021855	0.27325	14.1197	1.7509	15.5265	15
83	yes	yes		0.183047	0.01712	0.229074	11.0016	0.236342	12.9133	14
84	yes	yes		0.132023	0.105078	0.177001	10.1112	0.845609	10.6652	14
85	yes	yes		0.347444	0.01712	0.366946	49.77	0.666248	51.6782	14
86	yes	no	handling mistake	0.122149	0.01712	2.08711	9.58813	0.307349	13.3811	14
87	yes	yes		0.298676	0.22839	0.266641	13.2789	0.794703	13.7963	14
	This VAMS blank was excluded from statistical analyis.

## Sheet: ValueList_Helper
Bkgnd
BlkVrfy
CalBlk
CalStd
CICSpike
DilStd
DriftChk
FQBlk
IsoStd
QC1
QC2
QC3
QC4
QC5
Sample
Spike
Spike Ref
SQBlk
SQISTD
SQStd
